# Supplementary material for: High performance enzyme fuel cells using a genetically expressed FAD-dependent glucose dehydrogenase α-subunit of Burkholderia cepacia immobilized in a carbon nanotube electrode for low glucose conditions
Source: Royal Society of Chemistry journal article supplement (doi:10.1039/c3cp51864g), 2013-01-01
Supplement: c3cp51864g.pdf [file c3cp51864g.pdf]

Cite this: DOI: 10.1039/c0xx00000x

www.rsc.org/xxxxxx

COMMUNICATION

High Performance Enzyme Fuel Cell Using Genetically Expressed FAD-Dependent Glucose Dehydrogenase  $\alpha$ -Subunit of *Burkholderia cepacia* Immobilized in Carbon Nanotube Electrode for Low Glucose Condition

Deby Fapyane,<sup>a</sup> Soo-Jin Lee,<sup>a</sup> Seo-Hee Kang,<sup>b</sup> Du-Hyun Lim,<sup>c</sup> Kwon-Koo Cho,<sup>d</sup> Tae-hyun Nam,<sup>d</sup> Jae-Pyoung Ahn,<sup>e</sup> Jou-Hyeon Ahn,<sup>c</sup> Seon-Won Kim<sup>b</sup> and In Seop Chang<sup>\*a</sup>

Received (in XXX, XXX) Xth XXXXXXXXX 20XX, Accepted Xth XXXXXXXXX 20XX

DOI: 10.1039/b000000x

10 Supplementary information

Supplementary Table 1. PCR primers used for cloning of FAD-GDH gene from *B. cepacia* ATCC25416 and expression in *E. coli* BL21RIL.

| Primers | Sequences                               | Restriction sites |
|---------|-----------------------------------------|-------------------|
| BacH-F1 | 5'-GCATATGATGCACAACGACAACACTCCC-3'      | <i>Nde</i> I      |
| BacH-R1 | 5'-CGCGGCCGCGACTTCCTTCTCAGCGTGTCC-3'    | <i>Not</i> I      |
| BacH-F2 | 5'-GCCATGGCCATGCACAACGACAACACTCCCCAC-3' | <i>Nco</i> I      |
| BacH-R2 | 5'-GGAAGCTTCAGTGGTGGTGGTGGTGGTGGT-3'    | <i>Hind</i> III   |

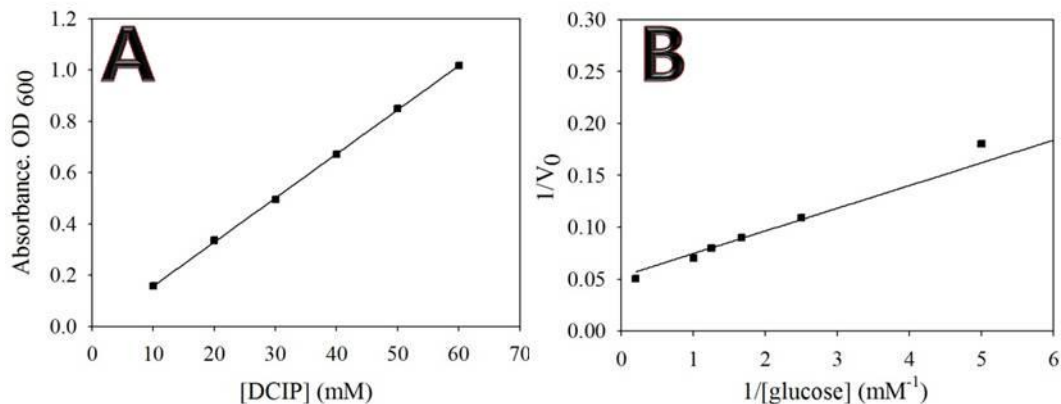

15 Supplementary Fig. 1 A) DCIP curve at 600 nm. B) Lineweaver-Burk plot for analysis of enzyme kinetic parameters,  $V_{\max}$  and  $K_m$

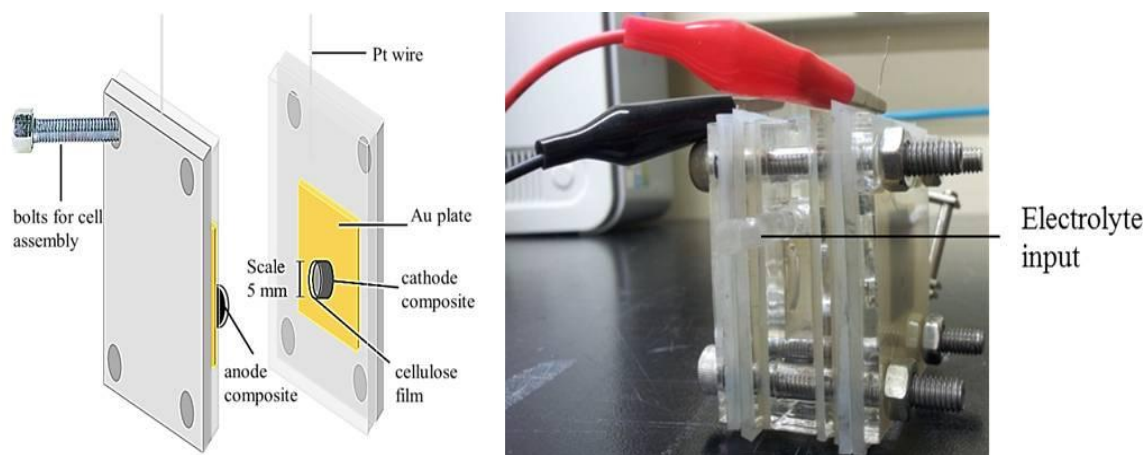

**Supplementary Fig. 2** (A) structure and (B) photograph of BFC

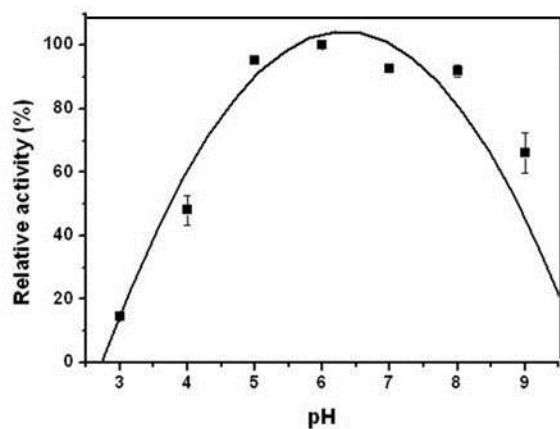

**Supplementary Fig. 3** Activity of FAD-GDH from *B. cepacia* for various pH values, represented as relative percentage to the highest activity obtained around neutral pH.

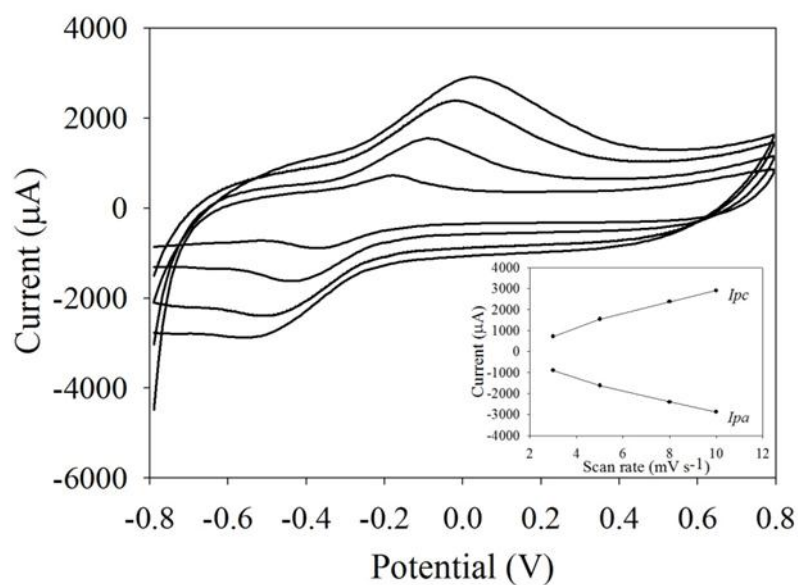

**Supplementary Fig. 4.** Cyclic voltammograms of FAD-GDH/menadione/CNT in 100 mM PBS buffer pH 7.0 at 30°C at 3, 5, 8 and 10 mV s<sup>-1</sup> (from inner to outer). Inset: Plots of peak currents vs. scan rate

5
